# Supplementary material for: Defining the architecture of KPC-2 Carbapenemase: identifying allosteric networks to fight antibiotics resistance
Source: PubMed Central journal article supplement (PMC6110804; doi:10.1038/s41598-018-31176-0), 2018-08-27
Supplement: 41598_2018_31176_MOESM1_ESM.pdf [file 41598_2018_31176_MOESM1_ESM.pdf]

## SUPPLEMENTARY INFORMATION

### **Defining the architecture of KPC-2 carbapenemase: identifying allosteric networks to fight antibiotic resistance**

Ioannis Galdadas<sup>1#</sup>, Silvia Lovera<sup>1#</sup>, Guillermo Pérez-Hernández<sup>3</sup>, Melissa D Barnes<sup>4</sup>, Jess Healy<sup>5</sup>, Hamidreza Afsharikhoh<sup>5</sup>, Neil Woodford<sup>6</sup>, Robert A Bonomo<sup>4</sup>, Francesco L Gervasio<sup>1,2</sup>, Shozeb Haider<sup>5\*</sup>

<sup>1</sup>Department of Chemistry, University College London, London, UK

<sup>2</sup>Institute of Structural and Molecular Biology, University College London, London, UK

<sup>3</sup>Department of Mathematics and Computer Science, Freie Universität Berlin, Berlin, Germany

<sup>4</sup>Department of Medicine, Case Western Reserve University & Research Service, Louis Stokes Cleveland Department of Veterans Affairs, Cleveland, Ohio

<sup>5</sup>UCL School of Pharmacy, University College London, London, UK

<sup>6</sup>Public Health England, London, UK



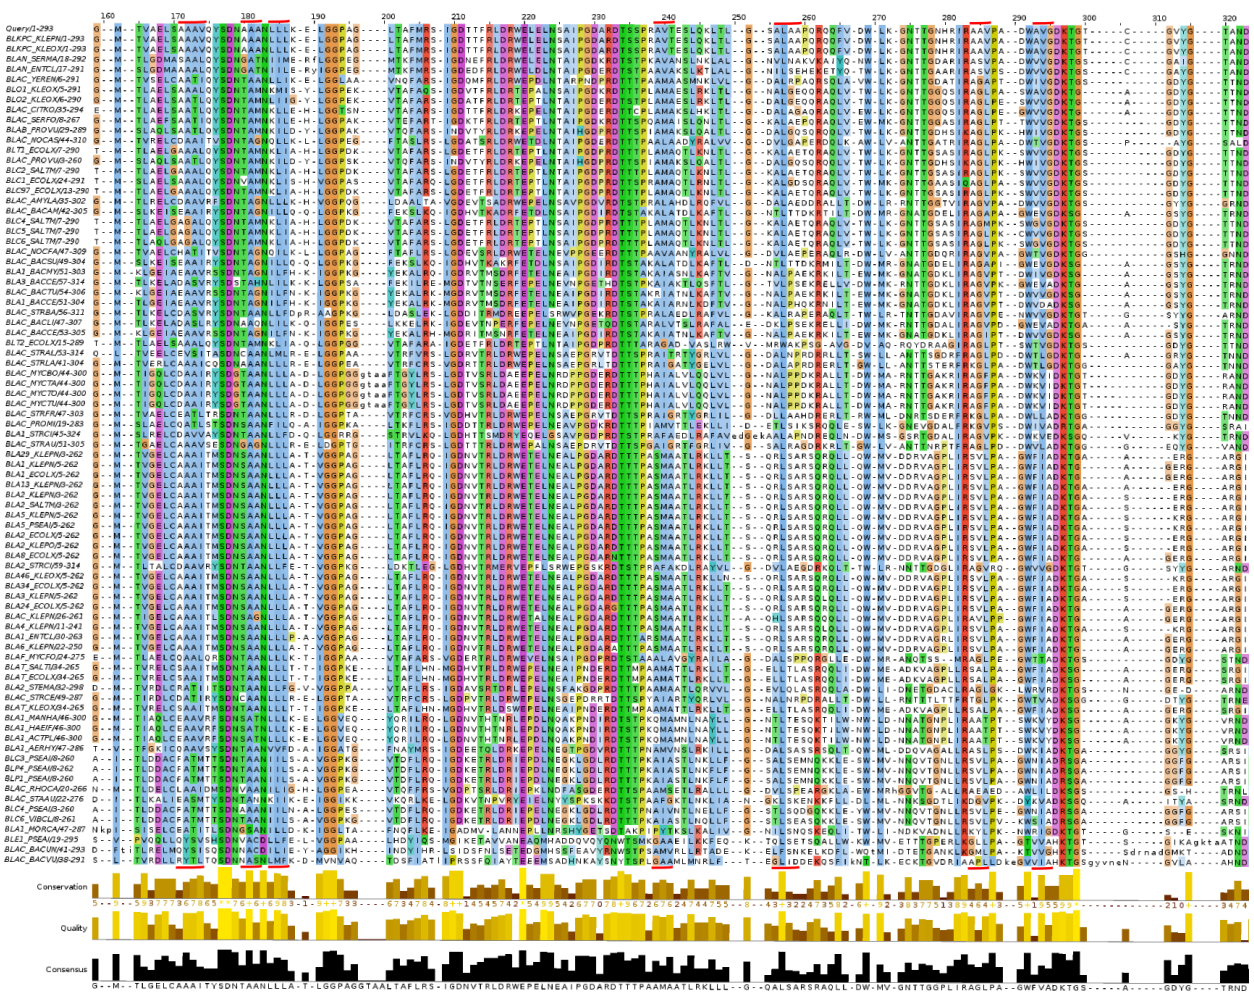

Supplementary Figure S1 (continued): Sequence alignment of 83 sequence matches obtained with the Jalview program (version 2) using KPC-2 sequence (2OV5.pdb) as query. The conserved residues are highlighted and the colouring is based on their chemical nature. Red bars have been included to highlight the position of residues in the hydrophobic networks.

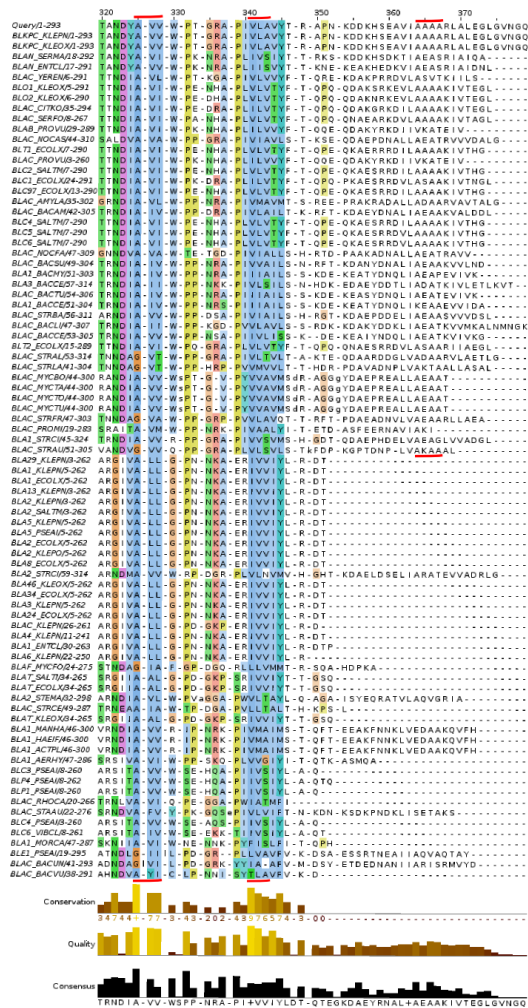

Supplementary Figure S1 (continued): Sequence alignment of 83 sequence matches obtained with the Jalview program (version 2) using KPC-2 sequence (2OV5.pdb) as query. The conserved residues are highlighted and the colouring is based on their chemical nature. Red bars have been included to highlight the position of residues in the hydrophobic networks.



| Target       | Description                                 | Species                                                          | E-value  |
|--------------|---------------------------------------------|------------------------------------------------------------------|----------|
| BLKPC_KLEPN# | Carbapenem-hydrolyzing beta-lactamase KPC   | <i>Klebsiella pneumoniae</i> #                                   | 1.2e-193 |
| BLKPC_KLEOX# | Carbapenem-hydrolyzing beta-lactamase KPC   | <i>Klebsiella oxytoca</i> #                                      | 1.2e-193 |
| BLAN_SERMA#  | Carbapenem-hydrolyzing beta-lactamase Sme-1 | <i>Serratia marcescens</i> #                                     | 6.9e-104 |
| BLAN_ENTCL#  | Imipenem-hydrolyzing beta-lactamase         | <i>Enterobacter cloacae</i> #                                    | 3.9e-100 |
| BLAC_YEREN#  | Beta-lactamase                              | <i>Yersinia enterocolitica</i> #                                 | 9.3e-86  |
| BLO1_KLEOX#  | Beta-lactamase OXY-1                        | <i>Klebsiella oxytoca</i> #                                      | 1.3e-85  |
| BLO2_KLEOX#  | Beta-lactamase OXY-2                        | <i>Klebsiella oxytoca</i> #                                      | 1.3e-84  |
| BLAC_CITKO#  | Beta-lactamase                              | <i>Citrobacter koseri</i> #                                      | 5.6e-84  |
| BLAC_SERFO#  | Beta-lactamase                              | <i>Serratia fonticola</i> #                                      | 3.5e-82  |
| BLAB_PROVU#  | Beta-lactamase                              | <i>Proteus vulgaris</i> #                                        | 7.2e-81  |
| BLAC_NOCAS#  | Beta-lactamase AST-1                        | <i>Nocardia asteroides</i> #                                     | 4.6e-80  |
| BLT1_ECOLX#  | Beta-lactamase Toho-1                       | <i>Escherichia coli</i> #                                        | 1.6e-79  |
| BLAC_PROVU#  | Beta-lactamase                              | <i>Proteus vulgaris</i> #                                        | 1.6e-79  |
| BLC2_SALTM#  | Beta-lactamase CTX-M-2                      | <i>Salmonella typhimurium</i> #                                  | 2.2e-79  |
| BLC1_ECOLX#  | Beta-lactamase CTX-M-1                      | <i>Escherichia coli</i> #                                        | 4.4e-79  |
| BLC97_ECOLX# | Beta-lactamase CTX-M-97                     | <i>Escherichia coli</i> #                                        | 5.5e-79  |
| BLAC_AMYLA#  | Beta-lactamase                              | <i>Amycolatopsis lactamdurans</i> #                              | 1.8e-78  |
| BLAC_BACAM#  | Beta-lactamase                              | <i>Bacillus amyloliquefaciens</i> #                              | 6.1e-78  |
| BLC4_SALTM#  | Beta-lactamase CTX-M-4                      | <i>Salmonella typhimurium</i> #                                  | 3.0e-77  |
| BLC5_SALTM#  | Beta-lactamase CTX-M-5                      | <i>Salmonella typhimurium</i> #                                  | 3.8e-77  |
| BLC6_SALTM#  | Beta-lactamase CTX-M-6                      | <i>Salmonella typhimurium</i> #                                  | 6.3e-77  |
| BLAC_NOCAF#  | Beta-lactamase FAR-1                        | <i>Nocardia farcinica</i> (strain IFM 10152)#                    | 1.7e-75  |
| BLAC_BACSU#  | Beta-lactamase                              | <i>Bacillus subtilis</i> (strain 168)#                           | 5.1e-72  |
| BLA1_BACMY#  | Beta-lactamase 1                            | <i>Bacillus mycoloides</i> #                                     | 3.1e-70  |
| BLA3_BACCE#  | Beta-lactamase 3                            | <i>Bacillus cereus</i> #                                         | 1.0e-69  |
| BLAC_BACTU#  | Beta-lactamase                              | <i>Bacillus thuringiensis</i> #                                  | 1.2e-69  |
| BLA1_BACCE#  | Beta-lactamase 1                            | <i>Bacillus cereus</i> #                                         | 1.9e-69  |
| BLAC_STRBA#  | Beta-lactamase                              | <i>Streptomyces badii</i> #                                      | 1.7e-68  |
| BLAC_BACLI#  | Beta-lactamase                              | <i>Bacillus licheniformis</i> #                                  | 2.0e-67  |
| BLAC_BACCE#  | Beta-lactamase 1                            | <i>Bacillus cereus</i> #                                         | 2.5e-67  |
| BLT2_ECOLX#  | Beta-lactamase Toho-2                       | <i>Escherichia coli</i> #                                        | 3.3e-67  |
| BLAC_STRAL#  | Beta-lactamase                              | <i>Streptomyces albus G</i> #                                    | 7.1e-67  |
| BLAC_STRLA#  | Beta-lactamase                              | <i>Streptomyces lavendulae</i> #                                 | 5.2e-66  |
| BLAC_MYCBO#  | Beta-lactamase                              | <i>Mycobacterium bovis</i> #                                     | 1.7e-63  |
| BLAC_MYCTA#  | Beta-lactamase                              | <i>Mycobacterium tuberculosis</i> (strain ATCC 25618 / H37Rv)#   | 1.7e-63  |
| BLAC_STRFR#  | Beta-lactamase                              | <i>Streptomyces fradiae</i> #                                    | 1.9e-63  |
| BLAC_PROMI#  | Beta-lactamase                              | <i>Proteus mirabilis</i> #                                       | 6.4e-63  |
| BLA1_STRCI#  | Beta-lactamase 1                            | <i>Streptomyces cacaoi</i> #                                     | 2.3e-62  |
| BLAC_STRAU#  | Beta-lactamase                              | <i>Streptomyces aureofaciens</i> #                               | 6.1e-62  |
| BLA29_KLEPN# | Beta-lactamase SHV-29                       | <i>Klebsiella pneumoniae</i> #                                   | 8.3e-62  |
| BLA1_KLEPN#  | Beta-lactamase SHV-1                        | <i>Klebsiella pneumoniae</i> #                                   | 2.8e-61  |
| BLA1_ECOLX#  | Beta-lactamase SHV-1                        | <i>Escherichia coli</i> #                                        | 2.8e-61  |
| BLA13_KLEPN# | Beta-lactamase SHV-13                       | <i>Klebsiella pneumoniae</i> #                                   | 4.0e-61  |
| BLA2_KLEPN#  | Beta-lactamase SHV-2                        | <i>Klebsiella pneumoniae</i> #                                   | 4.8e-61  |
| BLA2_SALTM#  | Beta-lactamase SHV-2                        | <i>Salmonella typhimurium</i> #                                  | 4.8e-61  |
| BLA5_KLEPN#  | Beta-lactamase SHV-5                        | <i>Klebsiella pneumoniae</i> #                                   | 9.2e-61  |
| BLA5_PSEAI#  | Beta-lactamase SHV-5                        | <i>Pseudomonas aeruginosa</i> #                                  | 9.2e-61  |
| BLA2_ECOLX#  | Beta-lactamase SHV-2                        | <i>Escherichia coli</i> #                                        | 9.2e-61  |
| BLA2_KLEPO#  | Beta-lactamase SHV-2                        | <i>Klebsiella pneumoniae</i> subsp. <i>ozaenae</i> #             | 9.2e-61  |
| BLA8_ECOLX#  | Beta-lactamase SHV-8                        | <i>Escherichia coli</i> #                                        | 1.4e-60  |
| BLA2_STRCI#  | Beta-lactamase 2                            | <i>Streptomyces cacaoi</i> #                                     | 1.5e-60  |
| BLA46_KLEOX# | Beta-lactamase SHV-46                       | <i>Klebsiella oxytoca</i> #                                      | 1.7e-60  |
| BLA34_ECOLX# | Beta-lactamase SHV-34                       | <i>Escherichia coli</i> #                                        | 1.8e-60  |
| BLA3_KLEPN#  | Beta-lactamase SHV-3                        | <i>Klebsiella pneumoniae</i> #                                   | 2.5e-60  |
| BLA24_ECOLX# | Beta-lactamase SHV-24                       | <i>Escherichia coli</i> #                                        | 2.7e-60  |
| BLAC_KLEPN#  | Beta-lactamase                              | <i>Klebsiella pneumoniae</i> #                                   | 5.2e-60  |
| BLA4_KLEPN#  | Beta-lactamase SHV-4                        | <i>Klebsiella pneumoniae</i> #                                   | 7.1e-60  |
| BLA1_ENTCL#  | Beta-lactamase Ohio-1                       | <i>Enterobacter cloacae</i> #                                    | 1.5e-59  |
| BLA6_KLEPN#  | Beta-lactamase SHV-6 (Fragment)             | <i>Klebsiella pneumoniae</i> #                                   | 1.9e-59  |
| BLAF_MYCFO#  | Beta-lactamase                              | <i>Mycobacterium fortitum</i> #                                  | 2.0e-58  |
| BLAT_SALTI#  | Beta-lactamase TEM                          | <i>Salmonella typhi</i> #                                        | 3.4e-58  |
| BLAT_ECOLX#  | Beta-lactamase TEM                          | <i>Escherichia coli</i> O111:H- (strain 11128 / EHEC)#           | 3.4e-58  |
| BLA2_STEMA#  | Beta-lactamase L2                           | <i>Stenotrophomonas maltophilia</i> #                            | 3.8e-58  |
| BLAC_STRCE#  | Beta-lactamase                              | <i>Streptomyces cellulosa</i> #                                  | 4.4e-58  |
| BLAT_KLEOX#  | Beta-lactamase TEM-12                       | <i>Klebsiella oxytoca</i> #                                      | 2.4e-57  |
| BLA1_MIANHA# | Beta-lactamase ROB-1                        | <i>Mannheimia haemolytica</i> #                                  | 5.9e-57  |
| BLA1_HAEIF#  | Beta-lactamase ROB-1                        | <i>Haemophilus influenzae</i> #                                  | 5.9e-57  |
| BLA1_ACTPL#  | Beta-lactamase ROB-1                        | <i>Actinobacillus pleuropneumoniae</i> serotype 7 (strain AP76)# | 5.9e-57  |
| BLA1_AERHY#  | Beta-lactamase AER-1                        | <i>Aeromonas hydrophila</i> #                                    | 3.1e-55  |
| BLC3_PSEAI#  | Beta-lactamase CARB-3                       | <i>Pseudomonas aeruginosa</i> #                                  | 4.5e-46  |
| BLP4_PSEAI#  | Beta-lactamase PSE-4                        | <i>Pseudomonas aeruginosa</i> #                                  | 9.2e-46  |
| BLP1_PSEAI#  | Beta-lactamase PSE-1                        | <i>Pseudomonas aeruginosa</i> #                                  | 1.6e-45  |
| BLAC_RHOCA#  | Beta-lactamase                              | <i>Rhodobacter capsulatus</i> #                                  | 1.0e-43  |
| BLAC_STAAU#  | Beta-lactamase                              | <i>Staphylococcus aureus</i> #                                   | 1.1e-43  |
| BLC4_PSEAI#  | Beta-lactamase CARB-4                       | <i>Pseudomonas aeruginosa</i> #                                  | 1.7e-43  |
| BLC6_VIBCL#  | Beta-lactamase CARB-6                       | <i>Vibrio cholerae</i> #                                         | 3.2e-43  |
| BLA1_MORCA#  | Beta-lactamase BRO-1                        | <i>Moraxella catarrhalis</i> #                                   | 1.7e-30  |
| BLE1_PSEAI#  | Extended-spectrum beta-lactamase PER-1      | <i>Pseudomonas aeruginosa</i> #                                  | 1.8e-20  |
| BLAC_BACUN#  | Beta-lactamase                              | <i>Bacteroides uniformis</i> #                                   | 7.4e-15  |
| BLAC_BACVU#  | Beta-lactamase                              | <i>Bacteroides vulgatus</i> #                                    | 1.7e-09  |

Supplementary Figure S2: Table generated by HMMER web server (version 1.8). The first column lists SwissProt codes of the sequences used for the alignment. For each SwissProt code a description of the protein name and/or family, organism's species and E-value have been associated for clarity and sake of completeness.



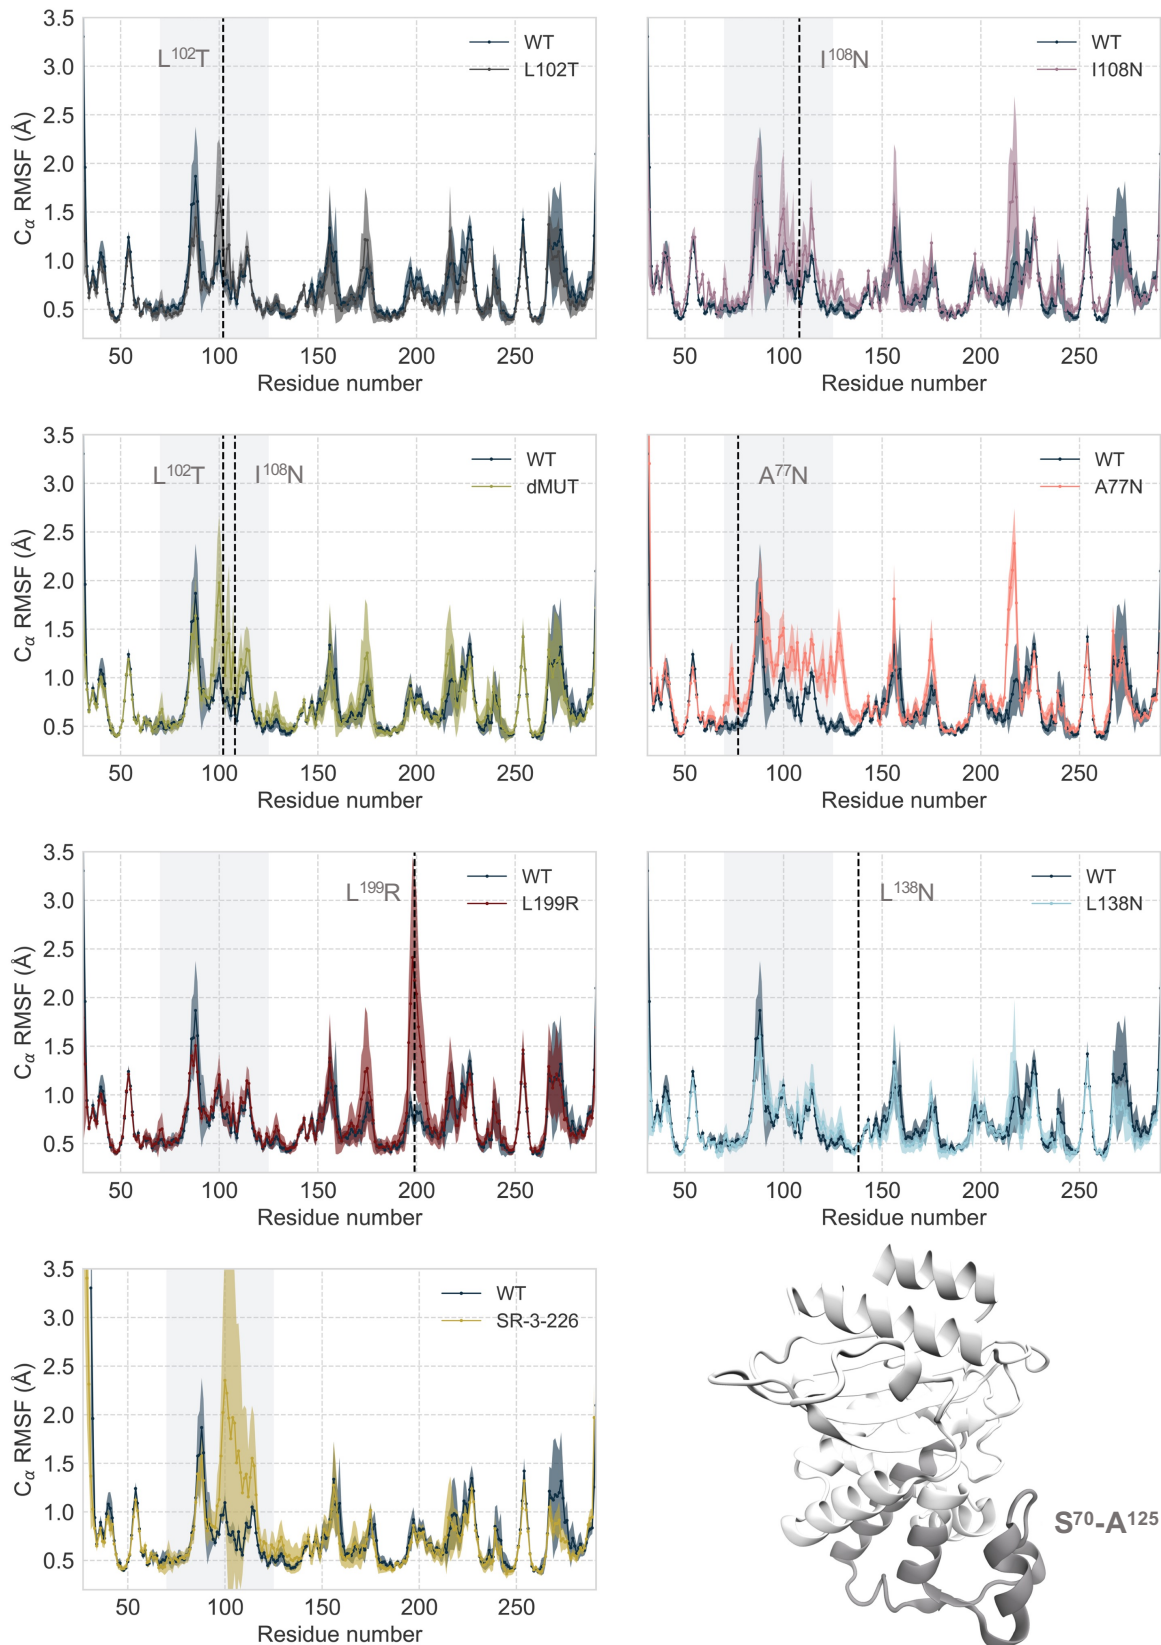

Supplementary Figure S4: RMSF profiles of KPC-2 WT, mutants and ligand bound structures derived from the whole set of the unbiased simulations. Mean values are represented as lines and standard deviation is indicated by shading. The most flexible region  $S^{70}$ - $A^{125}$  with respect to the WT in most of the systems has been highlighted in the graphs and represented in grey in the crystal structure.

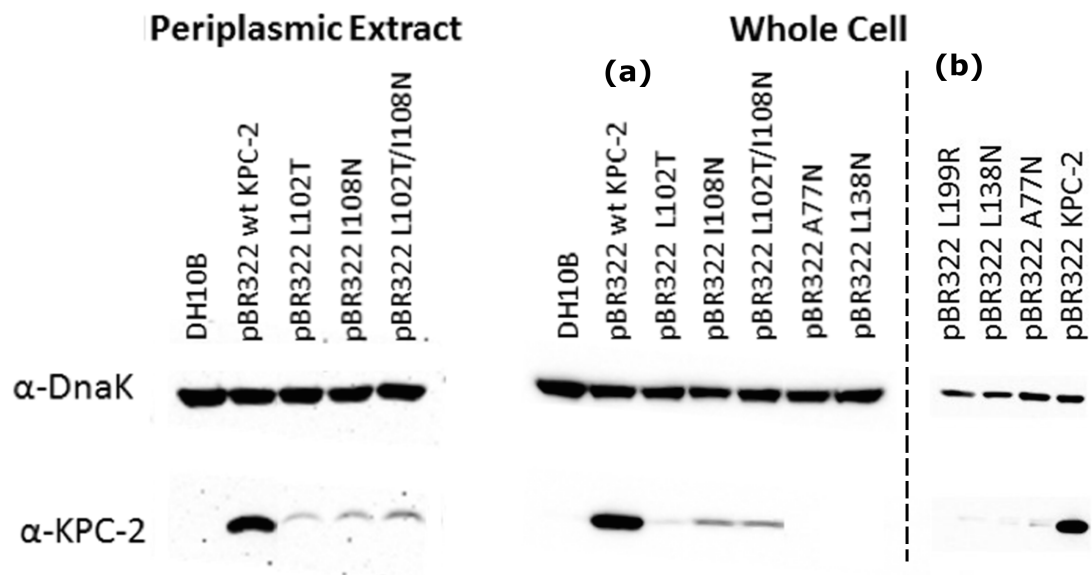

Figure S5: Immunoblots of periplasmic extract and whole cell lysate of DH10B cells expressing pBR322-catI-blaKPC-2 wild-type or variants (A<sup>77</sup>N, L<sup>102</sup>T, I<sup>108</sup>N, L<sup>138</sup>N, L<sup>199</sup>R or L<sup>102</sup>T/I<sup>108</sup>N). DnaK is a loading control. The whole cell lysate extract was run in two separate gels demarcated by the dashed lines and marked a and b).



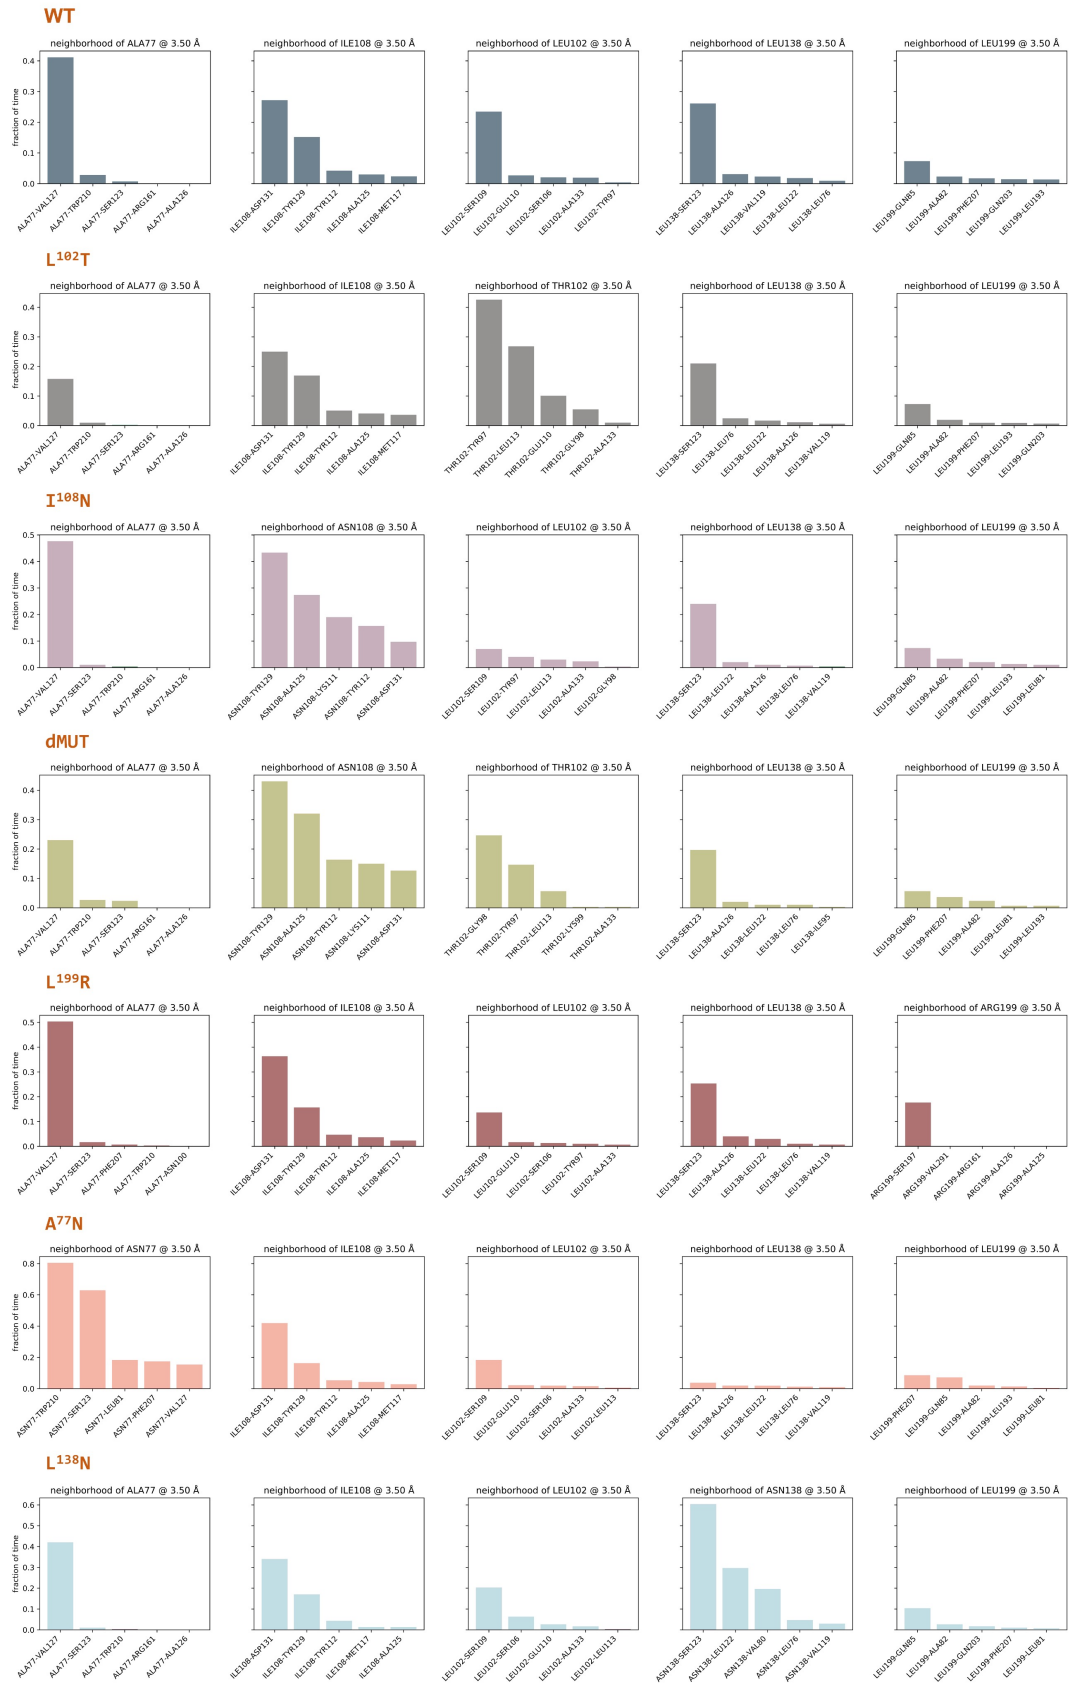

Figure S6: Important interactions formed between the mutated/WT residues and neighbour residues over the course of the unbiased simulations. As neighbour residues were considered the ones that their heavy atoms were 3.50 Å away from the mutated residue.

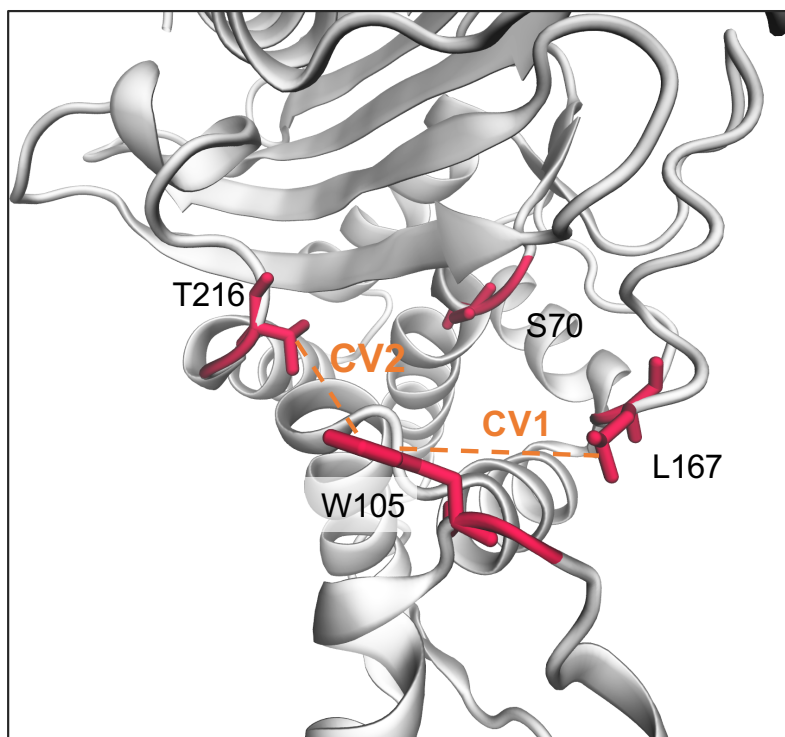

Supplementary Figure S7: Collective variables used in metadynamics simulations. CV1 describes the distance between the centre of mass of the indole ring of the side chain of  $W^{105}$  and the  $C_{\beta}$  of  $L^{167}$ . CV2 describes the distance between the centre of mass of the indole ring of the side chain of  $W^{105}$  and the  $C_{\beta}$  of  $T^{216}$ .

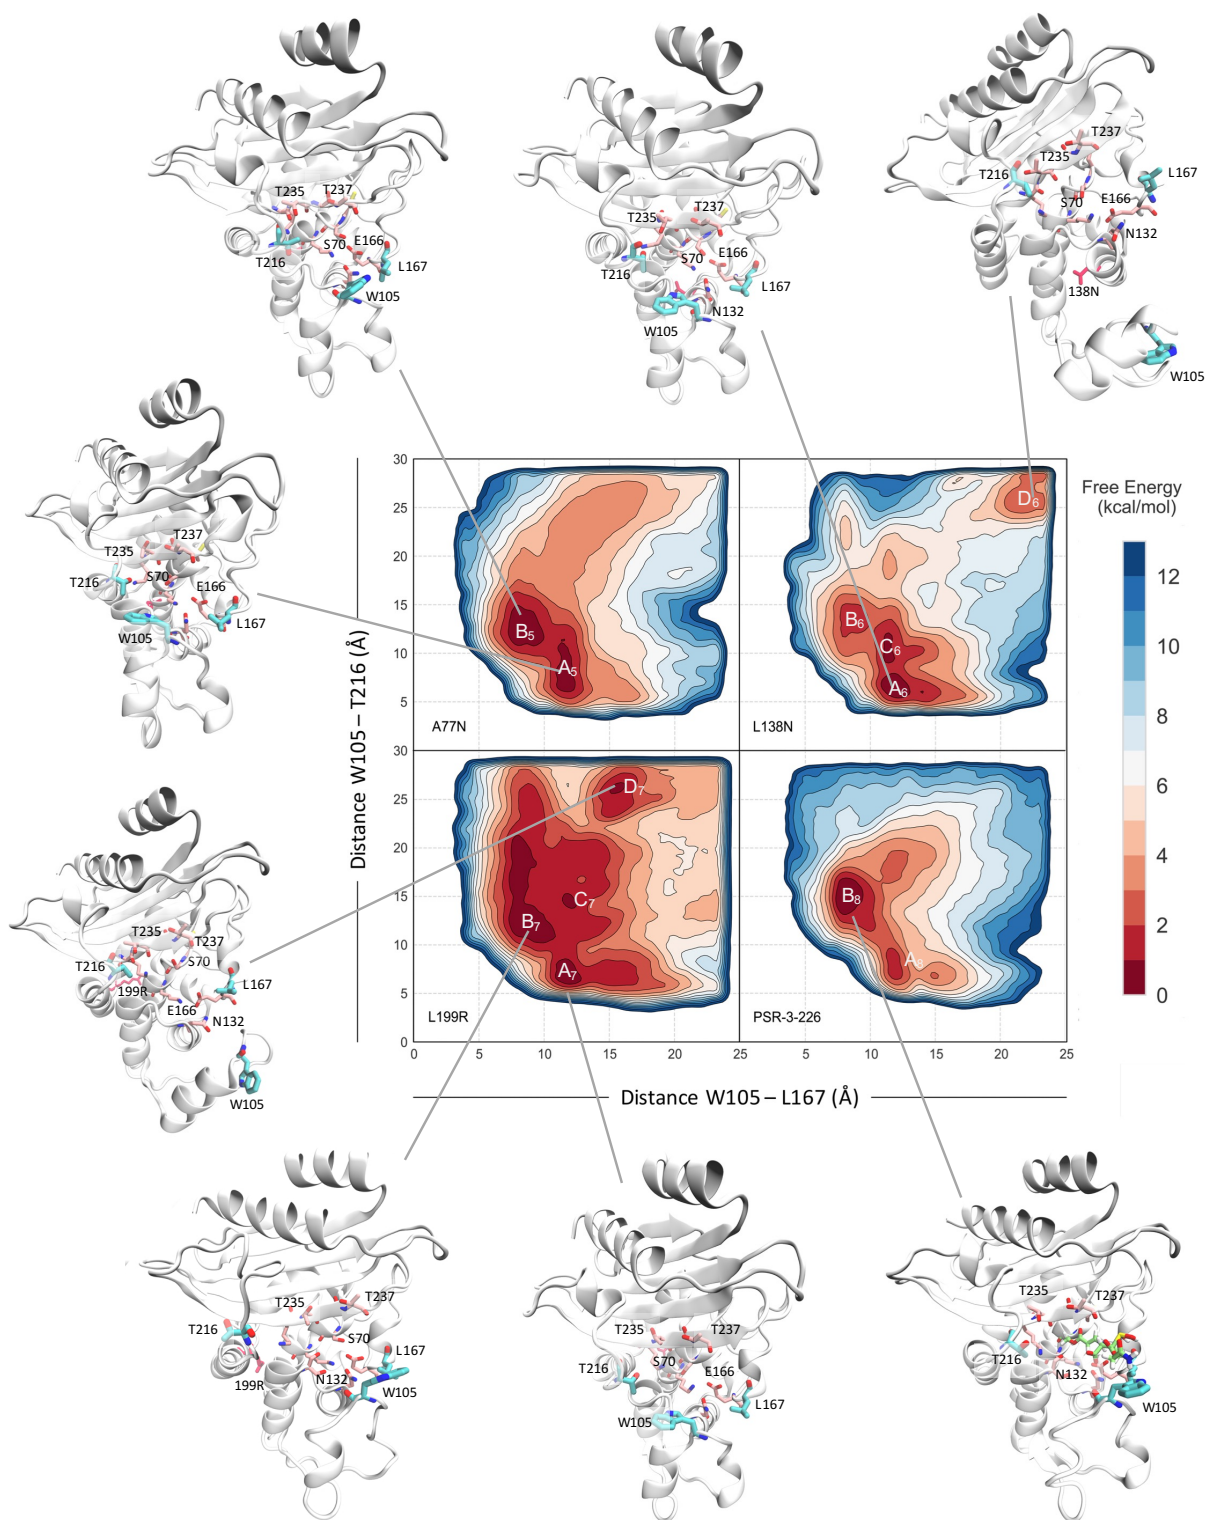

Figure S8: Free-energy surfaces (FES) plots of the KPC-2 single mutants A<sup>77</sup>N, L<sup>138</sup>N, L<sup>199</sup>R and the KPC-2 bound to PSR-3-226. The FES have been reconstructed along the two variables, CV1 (distance between the center of mass of the indole ring of the side chain of W<sup>105</sup> and C<sub>β</sub> of L<sup>167</sup>) and CV2 (distance between the center of mass of the indole ring of the side chain of W<sup>105</sup> and C<sub>β</sub> of T<sup>216</sup>). Structures extracted from their corresponding basins have been illustrated. The mutated residues are shown in red sticks, while residues that have been reported to be important for the catalysis [] are shown in pink sticks.

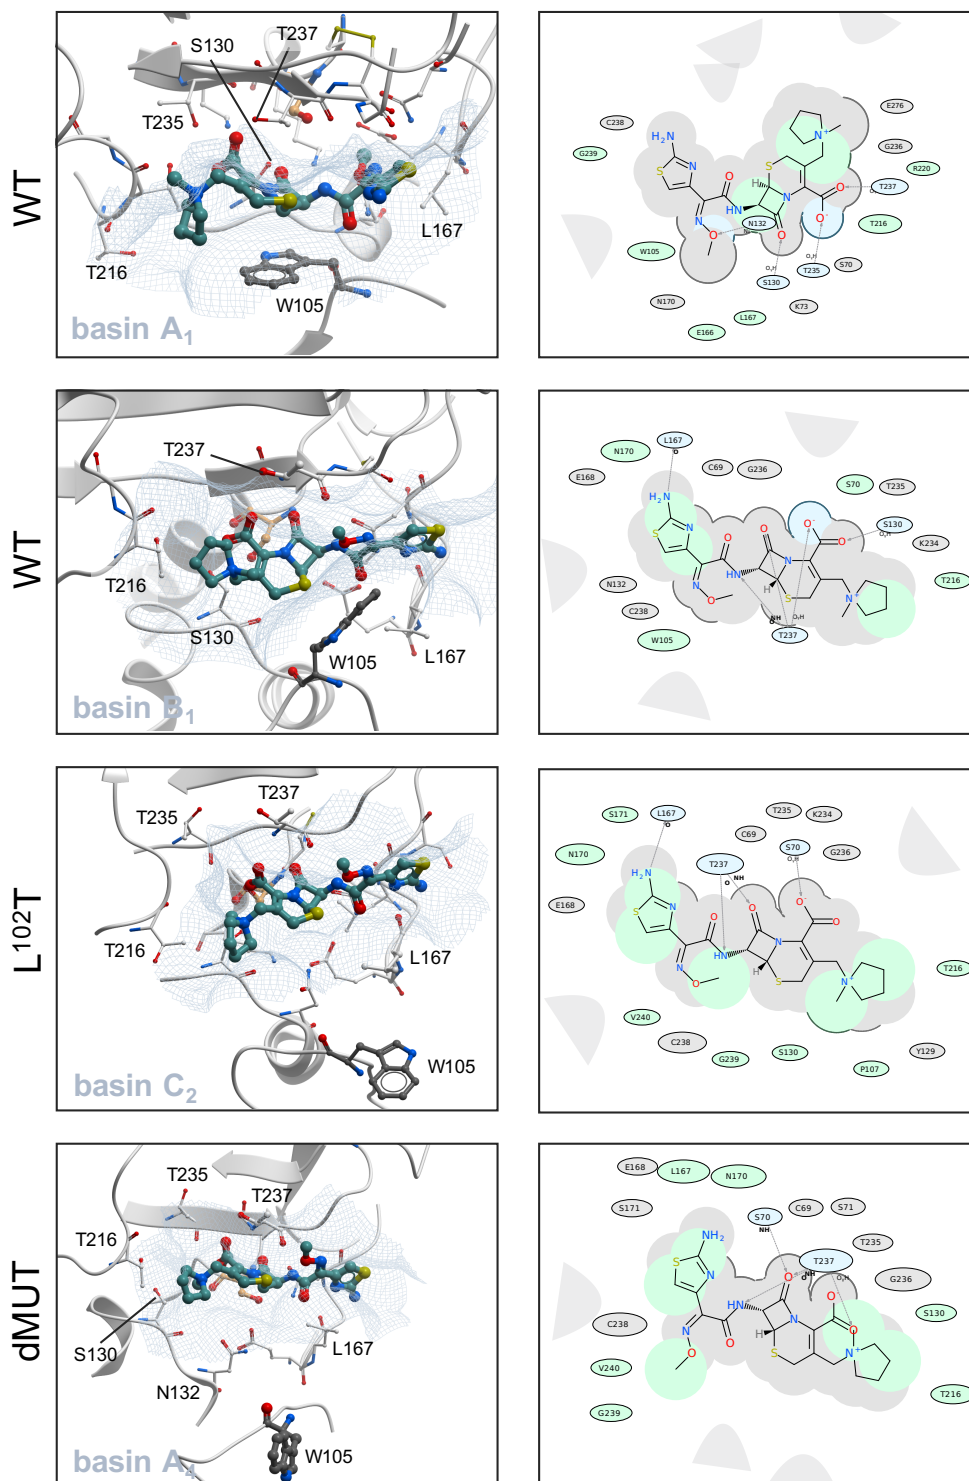

Figure S9: Binding poses and ligand interaction diagrams resulting from the docking of the experimentally tested antibiotic cefepime to exemplar conformations corresponding to selected basins of the free energy surfaces (Figure 3, main text). Coloring explanation of the ligand interaction diagrams: green shading represents hydrophobic regions, blue shading represents hydrogen bond acceptor, white dashed arrows represents hydrogen bonds, grey parabolas represents accessible surface for large areas, broken thick line around ligand shape indicates accessible surface, while the size of residue ellipse represents the strength of the contact.



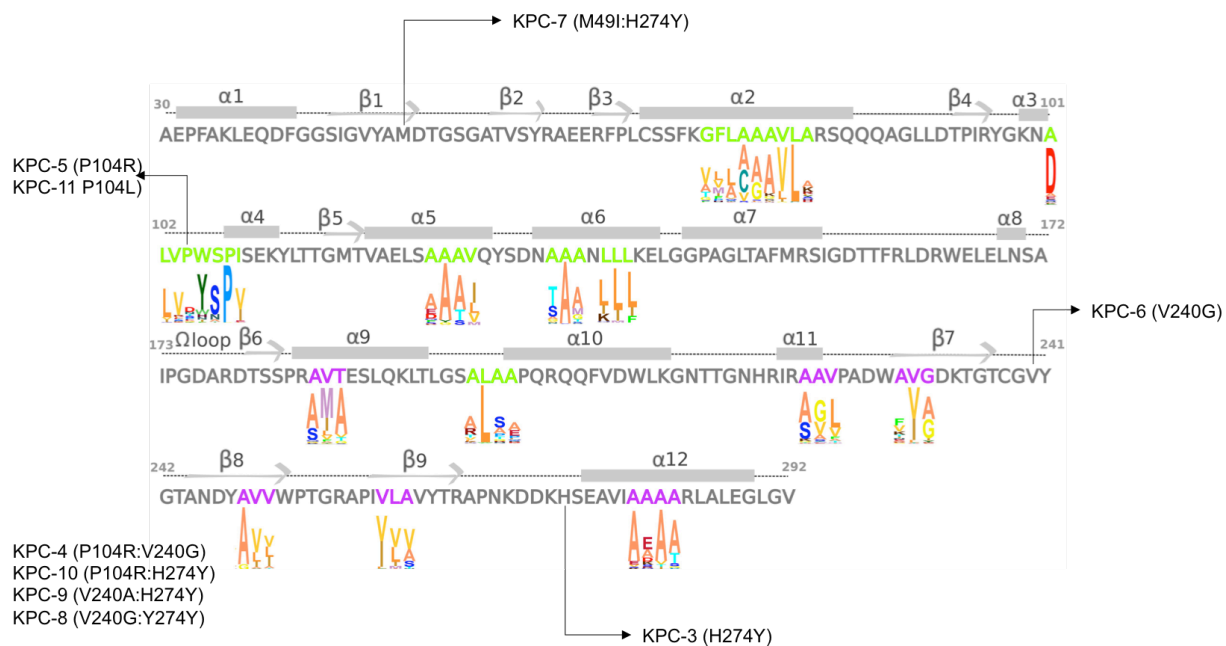

Figure S10: Sequence comparison of KPC variants. The difference between KPC2 and KPC3 is the H274Y mutation. There is complete conservation within the core and the hydrophobic nodes between the two variants.
